# Supplementary material for: Novel System to Monitor In Vivo Neural Graft Activity After Spinal Cord Injury
Source: Research Square preprint supplement (doi:10.21203/rs.3.rs-899013/v1), 2021-09-21
Supplement: Supplementary file 1 [file 5f239dcdf95632a53c34b4d0.pdf]

1    **Supplementary Fig. 1**

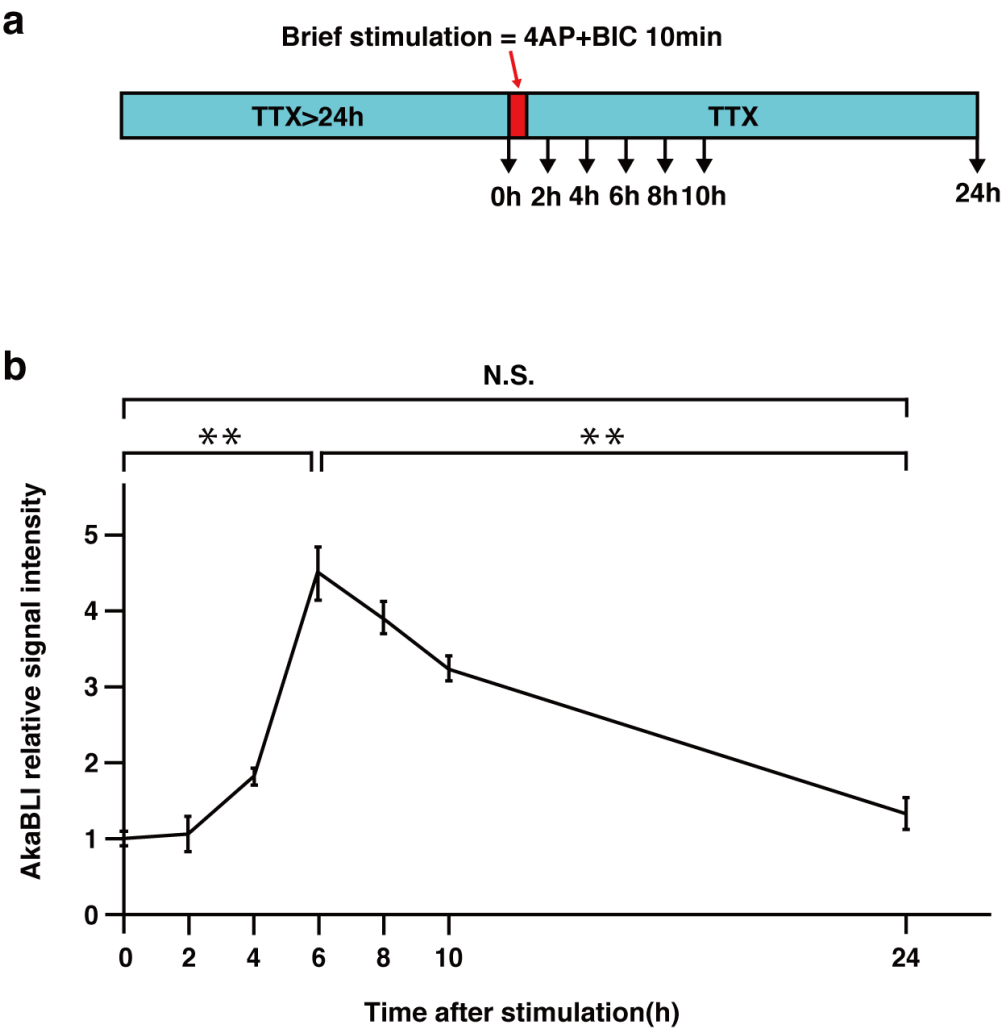

3    **Supplementary Fig. 1**

4    **BLI of hippocampal neurons stimulated with 4AP+BIC *in vitro***

5    **(a)** Scheme of the experiment used to detect the time course of ESAL expression using mouse

6    hippocampal neurons. Before and after brief stimulation, the neurons were silenced with 1uM

7    TTX.

(b) The result of multiple time-point BLI measurements in ESAL-expressing mouse hippocampal neurons. N = 5 independent experiments for 0, 6, 24 hours, and n = 3 for 2, 4, 8, 10 hours. Values are the mean  $\pm$  SEM; \*p < 0.05, \*\*p < 0.01. Statistical analyses were performed using the two-sided unpaired Student's *t* test. Individual t-values and degrees of freedom: 0 and 6 hours;  $t(8) = 10.42$ ,  $p = 6.2 \times 10^{-6}$ , 6 and 24 hours;  $t(8) = 8.357$ ,  $p = 3.2 \times 10^{-5}$ , 0 and 24 hours;  $t(8) = 1.568$ ,  $p = 0.16$ .

Supplementary Fig. 2

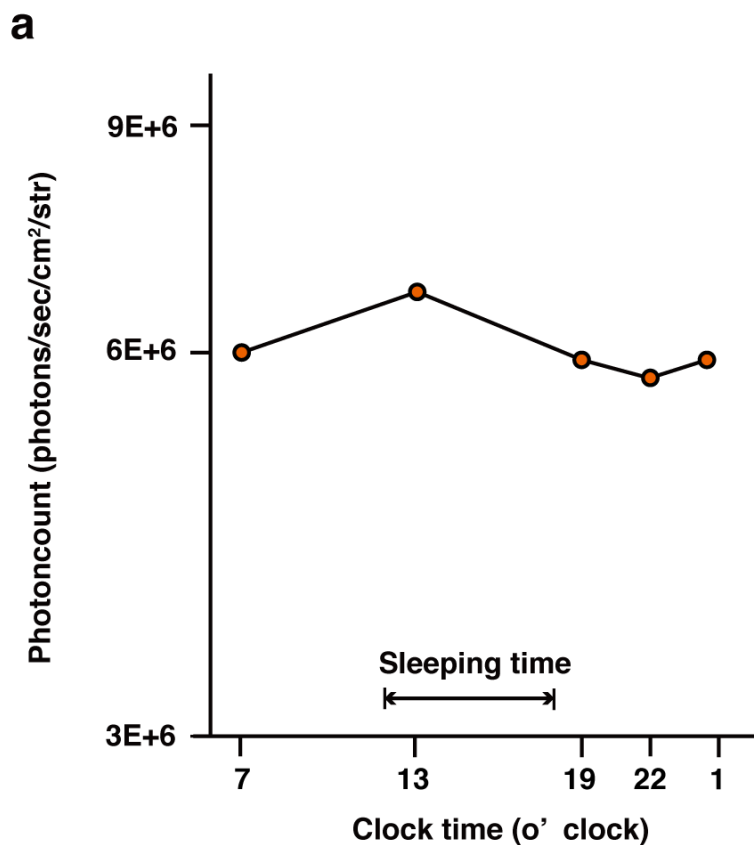

17    **Supplementary Fig. 2**

18    ***In vivo* monitoring of ESAL bioluminescence over the day**

19    **(a)** Representative diurnal transition of luminescence intensity in the cervical spine of an  
20    ESAL-expressing NS/PC-transplanted mouse (photons/sec/cm<sup>2</sup>/str). All the measurements  
21    were performed within a week (10–11 weeks after transplantation). Sleeping time in the figure  
22    shows a typical example because mice are nocturnal.

23

24

25
